# Supplementary material
Source: Springer Nature journal article supplement (https://www.springermedizin.de/resource/supplementary/12890_2012_333_MOESM3_ESM.pdf/9504964)

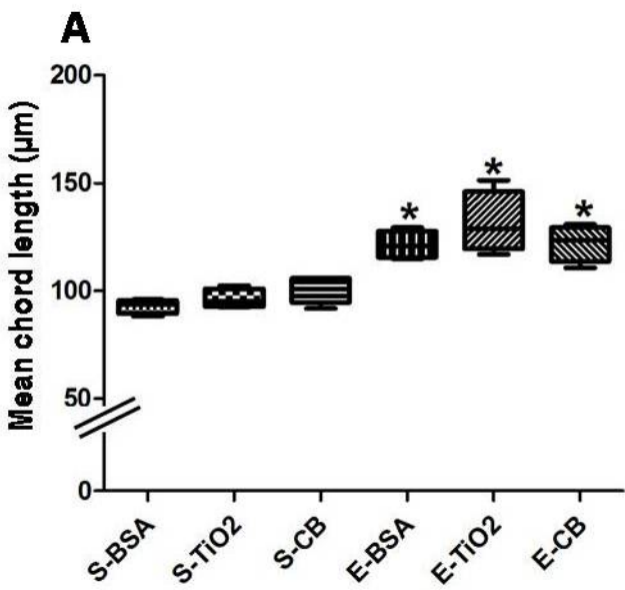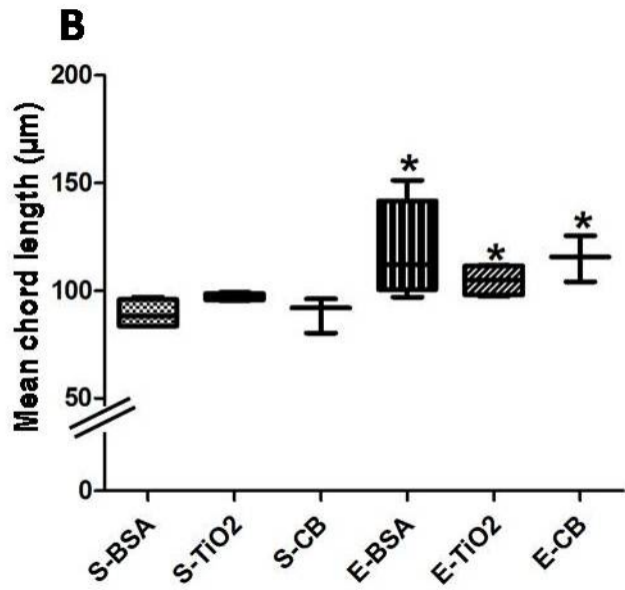

Supplement: MOESM3 [file 9504964]
